# Supplementary material
Source: PubMed Central journal article supplement (PMC6438734)
Supplement: NIHMS995936-supplement-Supp_figS1-5.pdf [file NIHMS995936-supplement-Supp_figS1-5.pdf]

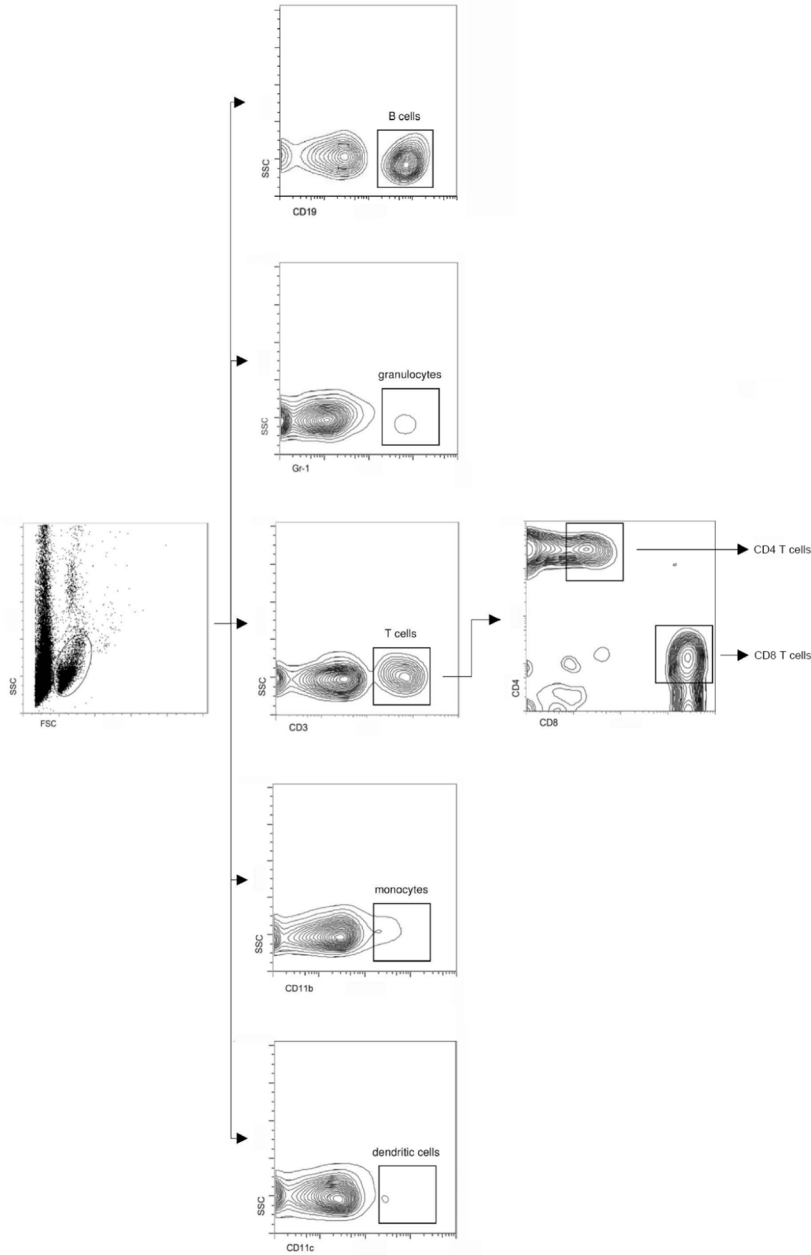

**Supplementary Figure 1. Strategy used for the identification of immune cells by flow cytometry.** PBMCs from 8-10 weeks old BDF1 mice were gated as B cells (CD19<sup>+</sup>), granulocytes (Gr1<sup>+</sup>), monocytes (CD11b<sup>+</sup>), dendritic cells (CD11c<sup>+</sup>) and CD3<sup>+</sup> T cells (further divided as CD8<sup>+</sup> and CD4<sup>+</sup> cells).

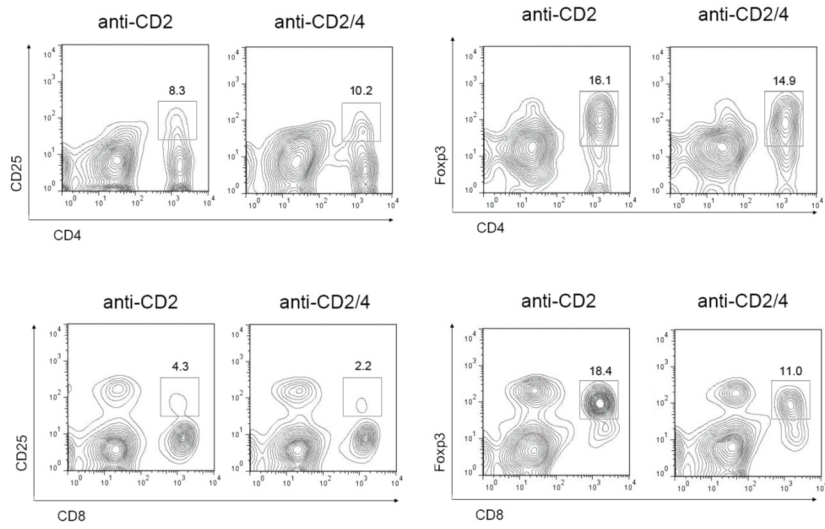

**Supplementary Figure 2.** Representative flow cytometry plots of the experiment in Figure 3, panel B, that compares the *in vivo* effects of treatment with anti-CD2/4 Ab-coated NPs vs. NPs coated with anti-CD2 alone on CD4 and CD8 T cells.

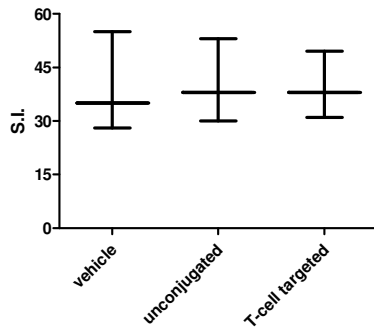

**Supplementary Figure 3. *In vitro* T cell responses to antigenic stimulation in the presence of PLGA NPs.** Treatment with NPs does not interfere with normal T cell responses to antigen stimulation. Splenocytes from DO11.10 mice were cultured with 10  $\mu\text{g/ml}$  OVA<sub>323-339</sub> peptide in the presence or absence (vehicle) of NPs encapsulated with IL-2 and TGF- $\beta$  (unconjugated: not coated; T cell-targeted: coated with anti-CD2/4 Ab). Stimulation index (S.I.) after 72 h in culture from a representative experiment of three in triplicate. P not significant.

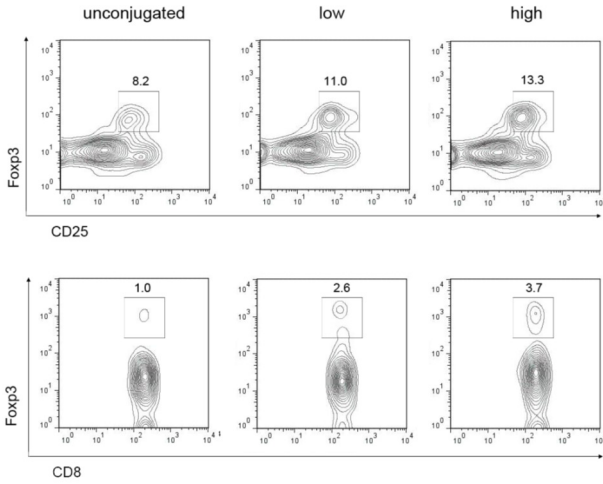

**Supplementary Figure 4.** Representative flow cytometry plots of the experiment shown in Figure 4, panel A. The comparison of the effects of administration of high doses vs. low doses of NPs encapsulated with IL-2/TGF- $\beta$  was evaluated *ex vivo* by flow cytometry at 4 weeks post-treatment. The data are on cells pregated for CD3 and CD4 (top panels) or CD8 (bottom panels).

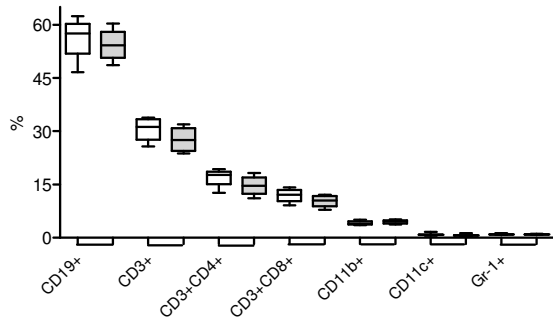

**Supplementary Figure 5.** Treatment of BDF1 mice with high doses of NPs encapsulating IL-2/TGF- $\beta$  (grey boxes) did not associate with significant changes in the frequency of multiple populations of circulating immune cells as compared to BDF1 mice receiving unconjugated NPs (white boxes). Flow cytometry analyses on PBMC included CD19<sup>+</sup> B cells, T cells (CD3<sup>+</sup> and its CD4<sup>+</sup> and CD8<sup>+</sup> subsets), CD11b<sup>+</sup> monocytes, CD11c<sup>+</sup> dendritic cells, Gr1<sup>+</sup> granulocytes. Data at week 2 post-treatment according to the protocol indicated in Figure 4; n=4 mice per group; P not significant.
